# Supplementary material
Source: publisher figshare collection journal article supplement (https://acs.figshare.com/ndownloader/files/4002682)
Supplement: Supplementary file 1 [file 4002682]

# **Superoleophobic textured copper surfaces fabricated by chemical etching / oxidation and surface fluorination**

Junfei Ou, Weihua Hu, Mingshan Xue,<sup>\*</sup> Fajun Wang, Wen Li,<sup>\*</sup>

*School of Materials Science and Engineering, Nanchang Hangkong University,  
Nanchang 330063, People's Republic of China*

---

<sup>\*</sup> To whom correspondence should be addressed. Tel.: +86-791-6453210; fax: +86-791-6453210  
E-mail: [wenl@ualberta.ca](mailto:wenl@ualberta.ca) or [xuems04@mails.gucas.ac.cn](mailto:xuems04@mails.gucas.ac.cn)

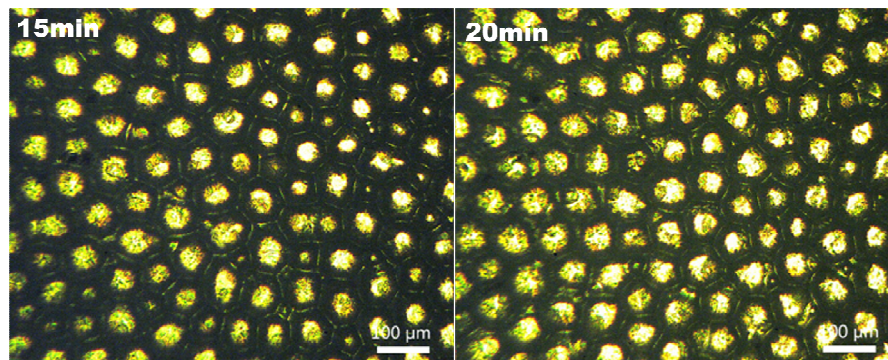

Figure 1s. Surface morphologies for copper treated by step 1 for 15 and 20 min

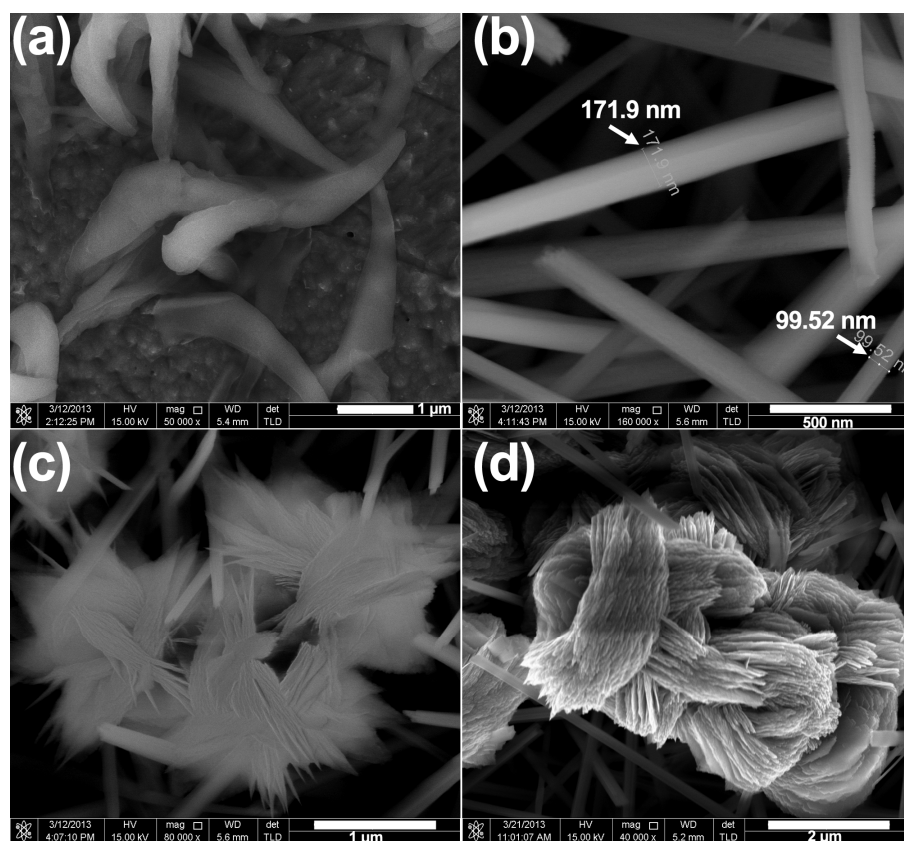

Figure 2s. Surface morphology variation as treating time of step 2: (a) 5 min, (b) 10 min, (c) 15 min, and (d) 30 min. Compared with Figure 1 (c), the magnification is much larger, so that the nanostructures can be seen more clearly

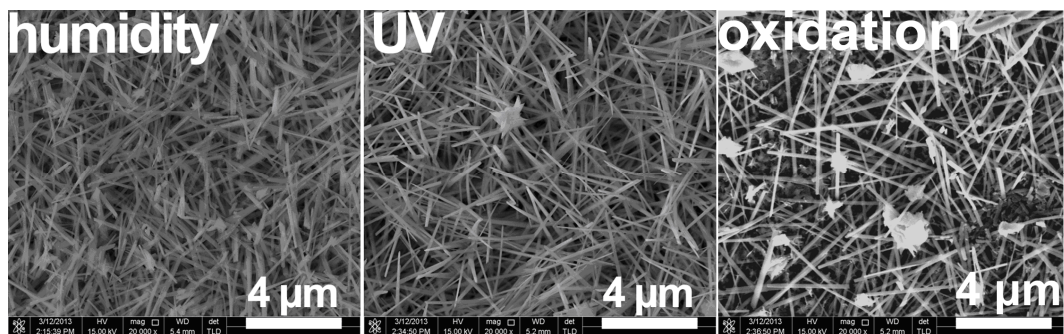

Figure 3s. Surface morphologies for the sample fabricated by step 1 (10 min) / step 2 (10 min) after humidity / UV / oxidation resistance test for 168 hours, 10 days, 10 days, respectively
